# Supplementary material for: Inhibition of methane and natural gas hydrate formation by altering the structure of water with amino acids
Source: PubMed Central journal article supplement (PMC4985706; doi:10.1038/srep31582), 2016-08-16
Supplement: srep31582-s1.pdf [file srep31582-s1.pdf]

Supplementary Information for:

## **Inhibition of methane and natural gas hydrate formation by altering the structure of water with amino acids**

Jeong-Hoon Sa<sup>1\*</sup>, Gye-Hoon Kwak<sup>1</sup>, Kunwoo Han<sup>2</sup>, Docheon Ahn<sup>3</sup>, Seong Jun Cho<sup>4</sup>,  
Ju Dong Lee<sup>4</sup>, and Kun-Hong Lee<sup>1\*</sup>

<sup>1</sup>*Department of Chemical Engineering, Pohang University of Science & Technology,*

*77 Cheongam-Ro, Nam-Gu, Pohang, Gyeongbuk 790-784, Korea*

<sup>2</sup>*CO<sub>2</sub> Project Team, Research Institute of Industrial Science & Technology,*

*67 Cheongam-Ro, Nam-Gu, Pohang, Gyeongbuk 790-600, Korea*

<sup>3</sup>*Beamline Division, Pohang Accelerator Laboratory,*

*80 Jigok-Ro 127Beon-Gil, Nam-Gu, Pohang, Gyeongbuk 790-834, Korea*

<sup>4</sup>*Offshore Plant Resources R&D Center, Korea Institute of Industrial Technology,*

*30 Gwahaksandan 1-Ro 60Beon-Gil, Gangseo-Gu, Busan 618-230, Korea*

\*Corresponding authors:

Dr. Jeong-Hoon Sa; Tel: 82-54-279-5305; Fax: 82-54-279-5949; e-mail: [jumuri@postech.ac.kr](mailto:jumuri@postech.ac.kr)

Prof. Kun-Hong Lee; Tel: 82-54-279-2271; Fax: 82-54-279-8298; e-mail: [ce20047@postech.ac.kr](mailto:ce20047@postech.ac.kr)

Present address of Dr. Jeong-Hoon Sa:

Chemical & Biological Engineering Department, Colorado School of Mines, 1500 Illinois Street,  
Golden, Colorado 80401, Unites States

Correspondence and requests for materials should be addressed to J.H.S. (e-mail: [jumuri@postech.ac.kr](mailto:jumuri@postech.ac.kr))  
or K.H.L. (e-mail: [ce20047@postech.ac.kr](mailto:ce20047@postech.ac.kr))

## 1. Materials and methods

### Materials

Distilled water was prepared in the laboratory. Ultra-high purity CH<sub>4</sub> (99.999%) was supplied by KOREA NOBLE GAS Co. (Korea), and the NG mixture (CH<sub>4</sub> 93.0%, C<sub>2</sub>H<sub>6</sub> 5.0%, C<sub>3</sub>H<sub>8</sub> 2.0%) was obtained from PS CHEM Co. (Korea). The chemicals used in this study, including glycine, L-alanine, L-serine, L-proline, polyvinyl pyrrolidone (PVP), and tetrahydrofuran (THF) were purchased from Sigma-Aldrich, USA. All chemicals were of reagent grade ( $\geq 99\%$ ) and used without further purification.

### Crystal morphology observation

THF hydrate crystals were synthesized by using a glass pipette (Fig. S1). The experimental procedure was similar to that in previous reports<sup>1,2</sup>. A glass test tube was filled with an aqueous THF solution with a concentration of 5.56 mol%, and closed with a rubber stopper coupled with a glass pipette. The test tube was then immersed in an ethylene glycol bath to maintain its temperature at 276.15 K. This temperature is 1.4 K above the phase equilibrium temperature of THF hydrates under atmospheric conditions<sup>3</sup>. To initiate THF hydrate formation, a thin Cu wire cooled in liquid N<sub>2</sub> was inserted into the glass pipette. As the growth front reached the end of the glass pipette, a small THF hydrate crystal grew into the aqueous phase. This procedure was repeated with aqueous THF solutions containing either 0.1 mol% of each amino acid or 0.5 wt% PVP.

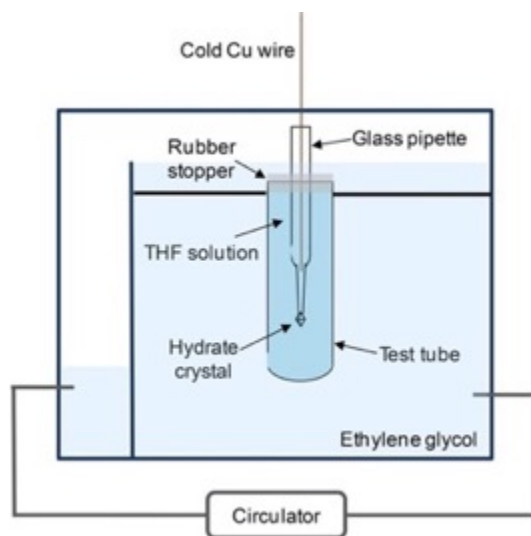

**Figure S1.** Experimental system for THF hydrate crystal morphology observation.

## 2. Model amino acids

Each amino acid has different characteristic physical and chemical properties, which strongly depend on its side chains. The properties of the amino acids tested in this study are summarized in Table S1.

**Table S1.** The physicochemical properties of the model amino acids.

| Amino acid                                                       | Glycine<br>(gly)                                                                  | Alanine<br>(ala)                                                                  | Serine<br>(ser)                                                                    | Proline<br>(pro)                                                                    |
|------------------------------------------------------------------|-----------------------------------------------------------------------------------|-----------------------------------------------------------------------------------|------------------------------------------------------------------------------------|-------------------------------------------------------------------------------------|
| Molecular structure                                              | 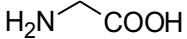 |  |  |  |
| Side chain                                                       | -H                                                                                | -CH <sub>3</sub>                                                                  | -CH <sub>2</sub> OH                                                                | -CH <sub>2</sub> CH <sub>2</sub> CH <sub>2</sub> -                                  |
| Solubility in water at<br>273.15 K (mol%) <sup>a</sup>           | 3.32                                                                              | 2.51                                                                              | 3.00                                                                               | 16.63                                                                               |
| Hydrophobicity <sup>b</sup>                                      | 1.8                                                                               | -0.4                                                                              | -0.8                                                                               | -1.6                                                                                |
| pK <sub>a1</sub> (-COOH)<br>at 273.15 K <sup>c</sup>             | 2.39                                                                              | 2.41                                                                              | 2.23                                                                               | 1.99                                                                                |
| pK <sub>a2</sub> (-NH <sub>2</sub> )<br>at 273.15 K <sup>c</sup> | 10.43                                                                             | 10.32                                                                             | 9.80                                                                               | 11.29                                                                               |

<sup>a</sup>Solubility values were obtained from previous reports<sup>4-6</sup>.

<sup>b</sup>Hydrophobicity values were obtained from a previous report<sup>7</sup>.

<sup>c</sup>Acid dissociation constants at 273.15 K were calculated by using the Van't Hoff equation and literature values from previous reports<sup>8-10</sup>.

### 3. Lattice parameter calculations

The lattice parameter values were calculated from the PXRD patterns by performing profile matching<sup>11</sup> with the FullProf program<sup>12</sup>.

**Table S2. Calculated lattice parameters of CH<sub>4</sub> hydrates in the presence of amino acids.**

| Temperature (K) | Lattice parameter (Å)   |                         |                         |                         |                         |
|-----------------|-------------------------|-------------------------|-------------------------|-------------------------|-------------------------|
|                 | Pure water              | gly<br>1.0 mol%         | L-ala<br>1.0 mol%       | L-ser<br>1.0 mol%       | L-pro<br>1.0 mol%       |
| 80              | 11.848886<br>± 0.000059 | 11.846941<br>± 0.000087 | 11.850635<br>± 0.000086 | 11.840753<br>± 0.000044 | 11.847330<br>± 0.000060 |
| 110             | 11.865589<br>± 0.000059 | -                       | -                       | -                       | -                       |
| 140             | 11.875465<br>± 0.000063 | -                       | -                       | -                       | -                       |
| 170             | 11.887923<br>± 0.000167 | -                       | -                       | -                       | -                       |
| 200             | 11.907848<br>± 0.000136 | -                       | -                       | -                       | -                       |

**Table S3. Calculated lattice parameters of NG hydrates in the presence of amino acids.**

| Temperature (K) | Lattice parameter (Å)   |                         |                         |                         |                         |
|-----------------|-------------------------|-------------------------|-------------------------|-------------------------|-------------------------|
|                 | Pure water              | gly<br>1.0 mol%         | L-ala<br>1.0 mol%       | L-ser<br>1.0 mol%       | L-pro<br>1.0 mol%       |
| 80              | 17.119015<br>± 0.000104 | 17.114351<br>± 0.000191 | 17.105139<br>± 0.000194 | 17.118622<br>± 0.000173 | 17.104891<br>± 0.000145 |
| 110             | 17.133560<br>± 0.000097 | -                       | -                       | -                       | -                       |
| 140             | 17.150503<br>± 0.000109 | -                       | -                       | -                       | -                       |
| 170             | 17.170921<br>± 0.000111 | -                       | -                       | -                       | -                       |
| 200             | 17.200790<br>± 0.000563 | -                       | -                       | -                       | -                       |

#### 4. Crystallographic information

**Table S4.** Crystallographic information for the amino acid crystals.

| Amino acid           | Crystal system | Space group              | Temperature (K) | Cell dimension (Å, °)                                                            | Reference                                                 |
|----------------------|----------------|--------------------------|-----------------|----------------------------------------------------------------------------------|-----------------------------------------------------------|
| α-glycine            | Monoclinic     | $P2_1/n$<br>(No. 14)     | 298             | a = 5.1020(8),<br>b = 11.971(2),<br>c = 5.458(2)<br>α = γ = 90,<br>β = 111.42(3) | <i>Acta Cryst.</i> <b>11</b> , 654-663<br>(1958).         |
|                      |                |                          | 120             | a = 5.084(1),<br>b = 11.820(2),<br>c = 5.4579(9)<br>α = γ = 90,<br>β = 111.95(2) | <i>Acta Cryst.</i> <b>B36</b> , 3052-3059<br>(1980).      |
| β-glycine            | Monoclinic     | $P2_1$<br>(No. 4)        | 298             | a = 5.077(4),<br>b = 6.267(6),<br>c = 5.379(9)<br>α = γ = 90,<br>β = 113.12      | <i>Acta Cryst.</i> <b>13</b> , 35-45<br>(1960).           |
| γ-glycine            | Trigonal       | $P3_1$<br>(No. 144)      | 298             | a = b = 7.037,<br>c = 5.483<br>α = β = 90,<br>γ = 120                            | <i>Acta Cryst.</i> <b>11</b> , 225-226<br>(1958).         |
|                      |                |                          | 83              | a = b = 6.975(2),<br>c = 5.473(2)<br>α = β = 90,<br>γ = 120                      | <i>Acta Cryst.</i> <b>B36</b> , 115-120<br>(1980).        |
| L-alanine            | Orthorhombic   | $P2_12_12_1$<br>(No. 19) | 298             | a = 6.032(1),<br>b = 12.343(1),<br>c = 5.784(1)<br>α = β = γ = 90                | <i>Acta Cryst.</i> <b>20</b> , 550-555<br>(1966).         |
|                      |                |                          | 23              | a = 5.928(1),<br>b = 12.260(2),<br>c = 5.794(1)<br>α = β = γ = 90                | <i>J. Phys. Chem.</i> <b>92</b> , 966-973<br>(1988).      |
| L-serine             | Orthorhombic   | $P2_12_12_1$<br>(No. 19) | 298             | a = 8.599(5),<br>b = 9.348(3),<br>c = 5.618(2)<br>α = β = γ = 90                 | <i>Acta Cryst.</i> <b>B30</b> , 2573-2578<br>(1974).      |
| L-serine monohydrate | Orthorhombic   | $P2_12_12_1$<br>(No. 19) | 298             | a = 9.365(7),<br>b = 12.239(9),<br>c = 4.835(7)<br>α = β = γ = 90                | <i>Acta Cryst.</i> <b>B29</b> , 876-884<br>(1973).        |
|                      |                |                          | 97              | a = 4.7987(4),<br>b = 9.3063(9),<br>c = 12.1460(11)<br>α = β = γ = 90            | <i>J. Phys. Chem. A</i> <b>114</b> ,<br>9570-9578 (2010). |
| L-proline            | Orthorhombic   | $P2_12_12_1$<br>(No. 19) | 298             | a = 11.550,<br>b = 9.020,<br>c = 5.200<br>α = β = γ = 90                         | <i>Kristallografiya</i> <b>10</b> ,<br>833-844 (1965).    |

## 5. In situ Raman spectra

The in situ Raman spectra of the CH<sub>4</sub> (Fig. S2) and NG hydrates (Fig. S3) in the presence of amino acids were recorded.

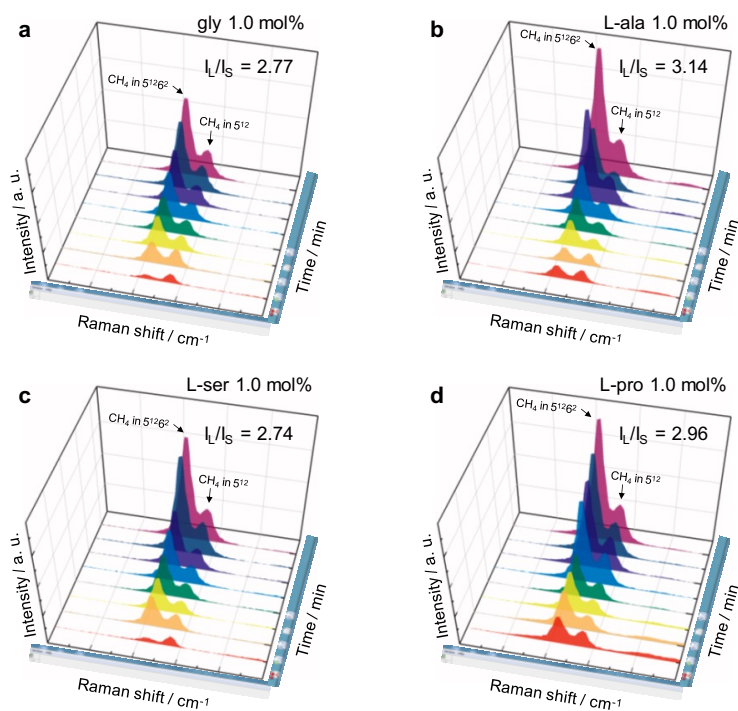

**Figure S2.** In situ Raman spectra of CH<sub>4</sub> hydrates at 274.15 K in the presence of (a) glycine, (b) L-alanine, (c) L-serine, and (d) L-proline for the C-H stretching region.  $I_L/I_S$  is the ratio of the peak intensities of the large and small hydrate cages.

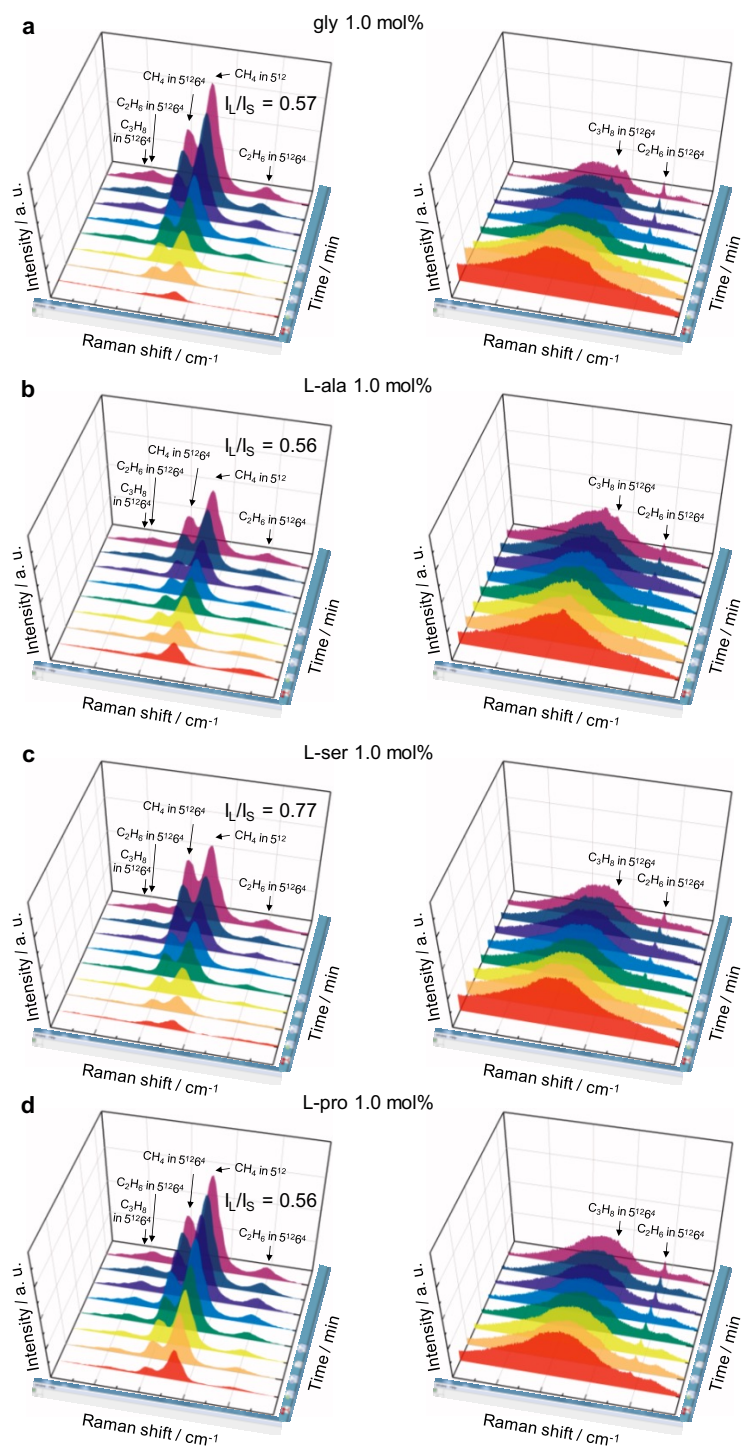

**Figure S3.** In situ Raman spectra of NG hydrates at 274.15 K in the presence of (a) glycine, (b) L-alanine, (c) L-serine, and (d) L-proline for the C-H and C-C stretching regions.  $I_L/I_S$  is the ratio of the peak intensities of the large and small hydrate cages.



## 6. Hydrate phase equilibrium data

**Table S5. Data for CH<sub>4</sub> hydrate phase equilibria in the presence of amino acids.**

| Pure water |         | gly<br>0.5 mol% |         | gly<br>1.3 mol% |         | gly<br>2.2 mol% |         | gly<br>3.0 mol% |         |
|------------|---------|-----------------|---------|-----------------|---------|-----------------|---------|-----------------|---------|
| T (K)      | P (bar) | T (K)           | P (bar) | T (K)           | P (bar) | T (K)           | P (bar) | T (K)           | P (bar) |
| 274.65     | 29.63   | 274.45          | 29.40   | 273.95          | 29.53   | 273.35          | 29.42   | 272.85          | 29.16   |
| 278.75     | 44.48   | 278.35          | 44.28   | 277.65          | 44.07   | 277.25          | 44.16   | 276.75          | 43.98   |
| 281.55     | 59.45   | 281.15          | 59.28   | 280.45          | 59.10   | 279.95          | 58.99   | 279.45          | 58.78   |
| 283.55     | 74.61   | 283.25          | 74.25   | 282.45          | 73.95   | 282.05          | 74.01   | 281.40          | 73.49   |
| 285.15     | 89.96   | 284.85          | 89.65   | 284.30          | 89.30   | 283.75          | 89.23   | 283.05          | 88.71   |

| L-ala<br>0.5 mol% |         | L-ala<br>1.3 mol% |         | L-ala<br>2.2 mol% |         | L-ser<br>1.3 mol% |         | L-ser<br>3.0 mol% |         |
|-------------------|---------|-------------------|---------|-------------------|---------|-------------------|---------|-------------------|---------|
| T (K)             | P (bar) | T (K)             | P (bar) | T (K)             | P (bar) | T (K)             | P (bar) | T (K)             | P (bar) |
| 274.25            | 29.47   | 273.95            | 29.53   | 273.05            | 29.32   | 273.75            | 29.38   | 272.65            | 29.37   |
| 278.25            | 44.13   | 277.65            | 44.07   | 276.95            | 44.03   | 277.45            | 44.23   | 276.50            | 44.00   |
| 281.05            | 59.19   | 280.35            | 59.08   | 279.85            | 59.01   | 280.25            | 59.17   | 279.15            | 58.85   |
| 283.25            | 74.33   | 282.35            | 73.61   | 281.92            | 73.93   | 282.25            | 74.25   | 281.20            | 73.81   |
| 284.85            | 89.52   | 284.15            | 89.28   | 283.58            | 89.14   | 284.05            | 89.40   | 282.85            | 88.89   |

| L-pro<br>1.3 mol% |         | L-pro<br>3.0 mol% |         | L-pro<br>6.0 mol% |         | L-pro<br>9.0 mol% |         |
|-------------------|---------|-------------------|---------|-------------------|---------|-------------------|---------|
| T (K)             | P (bar) | T (K)             | P (bar) | T (K)             | P (bar) | T (K)             | P (bar) |
| 273.65            | 29.41   | 272.30            | 29.29   | 268.40            | 28.87   | 264.90            | 28.39   |
| 277.35            | 44.21   | 276.15            | 44.05   | 272.49            | 43.33   | 268.10            | 42.43   |
| 280.05            | 59.06   | 278.85            | 58.74   | 275.05            | 57.77   | 270.65            | 56.62   |
| 282.25            | 74.16   | 280.95            | 73.78   | 277.00            | 72.31   | 272.65            | 70.74   |
| 283.85            | 89.34   | 282.50            | 88.68   | 278.65            | 86.98   | 274.00            | 84.73   |

**Table S6. Data for NG hydrate phase equilibria in the presence of amino acids.**

| Pure water |         | gly<br>0.5 mol% |         | gly<br>1.3 mol% |         | gly<br>2.2 mol% |         | gly<br>3.0 mol% |         |
|------------|---------|-----------------|---------|-----------------|---------|-----------------|---------|-----------------|---------|
| T (K)      | P (bar) | T (K)           | P (bar) | T (K)           | P (bar) | T (K)           | P (bar) | T (K)           | P (bar) |
| 276.30     | 12.75   | 276.25          | 12.48   | 275.85          | 12.43   | 275.45          | 12.47   | 274.85          | 12.45   |
| 280.70     | 19.54   | 280.45          | 19.47   | 280.15          | 19.52   | 279.75          | 19.50   | 279.15          | 19.43   |
| 283.30     | 26.56   | 283.05          | 26.56   | 282.65          | 26.53   | 282.25          | 26.43   | 281.75          | 26.51   |
| 285.25     | 33.85   | 285.05          | 33.71   | 284.75          | 33.55   | 284.35          | 33.55   | 283.85          | 33.55   |
| 287.05     | 40.94   | 286.75          | 40.86   | 286.45          | 41.03   | 285.95          | 40.88   | 285.35          | 40.70   |

| L-ala<br>0.5 mol% |         | L-ala<br>1.3 mol% |         | L-ala<br>2.2 mol% |         | L-ser<br>1.3 mol% |         | L-ser<br>3.0 mol% |         |
|-------------------|---------|-------------------|---------|-------------------|---------|-------------------|---------|-------------------|---------|
| T (K)             | P (bar) | T (K)             | P (bar) | T (K)             | P (bar) | T (K)             | P (bar) | T (K)             | P (bar) |
| 276.15            | 12.51   | 275.75            | 12.45   | 275.15            | 12.37   | 275.45            | 12.40   | 274.05            | 12.36   |
| 280.15            | 19.48   | 279.95            | 19.50   | 279.45            | 19.50   | 279.75            | 19.49   | 278.35            | 19.38   |
| 282.95            | 26.55   | 282.55            | 26.55   | 282.05            | 26.55   | 282.55            | 26.55   | 281.45            | 26.43   |
| 284.85            | 33.71   | 284.55            | 33.57   | 284.15            | 33.59   | 284.45            | 33.73   | 283.45            | 33.50   |
| 286.65            | 41.02   | 286.35            | 41.06   | 285.75            | 40.86   | 286.15            | 40.67   | 284.75            | 40.52   |

| L-pro<br>1.3 mol% |         | L-pro<br>3.0 mol% |         | L-pro<br>6.0 mol% |         | L-pro<br>9.0 mol% |         |
|-------------------|---------|-------------------|---------|-------------------|---------|-------------------|---------|
| T (K)             | P (bar) | T (K)             | P (bar) | T (K)             | P (bar) | T (K)             | P (bar) |
| 274.85            | 12.41   | 273.65            | 12.34   | 270.75            | 12.35   | 267.65            | 12.06   |
| 279.35            | 19.46   | 277.65            | 19.30   | 274.50            | 19.03   | 271.25            | 18.91   |
| 282.05            | 26.46   | 280.45            | 26.31   | 277.10            | 25.95   | 274.00            | 25.68   |
| 283.95            | 33.60   | 282.45            | 33.39   | 279.20            | 32.92   | 275.70            | 32.57   |
| 285.45            | 40.66   | 283.75            | 40.55   | 280.65            | 39.95   | 276.75            | 39.32   |

## 7. Regression of hydrate phase equilibrium data with an Antoine-like equation

Antoine-like equation:  $\ln P \text{ (bar)} = a + b/T \text{ (K)}$

**Table S7. Coefficients of the regression equation fitted to CH<sub>4</sub> hydrate phase equilibria.**

| System     | Concentration (mol%) | a       | b          |
|------------|----------------------|---------|------------|
| Pure water | -                    | 34.4404 | -8540.8199 |
| gly        | 0.5                  | 34.3362 | -8502.7111 |
|            | 1.3                  | 33.9824 | -8384.0658 |
|            | 2.2                  | 34.0895 | -8399.8548 |
|            | 3.0                  | 34.8552 | -8598.0141 |
| L-ala      | 0.5                  | 33.7398 | -8333.2723 |
|            | 1.3                  | 34.4614 | -8516.3482 |
|            | 2.2                  | 33.7328 | -8294.9022 |
| L-ser      | 1.3                  | 34.2065 | -8440.1339 |
|            | 3.0                  | 34.6077 | -8520.9912 |
| L-pro      | 1.3                  | 34.3594 | -8479.5797 |
|            | 3.0                  | 34.4927 | -8479.6671 |
|            | 6.0                  | 34.3103 | -8317.8703 |
|            | 9.0                  | 36.0147 | -8654.0903 |

**Table S8. Coefficients of the regression equation fitted to NG hydrate phase equilibria.**

| System     | Concentration (mol%) | a       | b          |
|------------|----------------------|---------|------------|
| Pure water | -                    | 35.1041 | -9011.5565 |
| gly        | 0.5                  | 35.8276 | -9210.4818 |
|            | 1.3                  | 35.6570 | -9151.4956 |
|            | 2.2                  | 35.8975 | -9206.2017 |
|            | 3.0                  | 35.7538 | -9148.0186 |
| L-ala      | 0.5                  | 35.5808 | -9135.0064 |
|            | 1.3                  | 35.5282 | -9110.2807 |
|            | 2.2                  | 35.5595 | -9103.2140 |
| L-ser      | 1.3                  | 35.2683 | -9032.8011 |
|            | 3.0                  | 35.0677 | -8938.4139 |
| L-pro      | 1.3                  | 36.0779 | -9244.6081 |
|            | 3.0                  | 36.7703 | -9388.7323 |
|            | 6.0                  | 36.2210 | -9133.3231 |
|            | 9.0                  | 39.2628 | -9857.5821 |

## 8. Quantitative analysis of hydrate phase equilibrium data

The  $\Delta T$  and  $\Delta P$  values were calculated by performing quantitative analyses of the hydrate phase equilibrium data.

**Table S9. Quantitative analysis of the CH<sub>4</sub> hydrate phase equilibrium data.**

| gly 0.5 mol% |         |                    |                |                      |                  |
|--------------|---------|--------------------|----------------|----------------------|------------------|
| T (K)        | P (bar) | T <sub>0</sub> (K) | $\Delta T$ (K) | P <sub>0</sub> (bar) | $\Delta P$ (bar) |
| 274.45       | 29.40   | 274.9834           | -0.53337       | 27.67788             | 1.722119         |
| 278.35       | 44.28   | 278.6577           | -0.30765       | 42.80508             | 1.474916         |
| 281.15       | 59.28   | 281.3355           | -0.18553       | 58.10427             | 1.175726         |
| 283.25       | 74.25   | 283.4378           | -0.18778       | 72.78146             | 1.468540         |
| 284.85       | 89.65   | 285.2218           | -0.37178       | 86.21378             | 3.436218         |
| gly 1.3 mol% |         |                    |                |                      |                  |
| T (K)        | P (bar) | T <sub>0</sub> (K) | $\Delta T$ (K) | P <sub>0</sub> (bar) | $\Delta P$ (bar) |
| 273.95       | 29.53   | 275.0224           | -1.07244       | 26.14964             | 3.380363         |
| 277.65       | 44.07   | 278.6144           | -0.96444       | 39.61858             | 4.451418         |
| 280.45       | 59.10   | 281.3073           | -0.85735       | 53.86149             | 5.238513         |
| 282.45       | 73.95   | 283.3997           | -0.94970       | 66.82367             | 7.126335         |
| 284.3        | 89.30   | 285.1845           | -0.88453       | 81.35518             | 7.944816         |
| gly 2.2 mol% |         |                    |                |                      |                  |
| T (K)        | P (bar) | T <sub>0</sub> (K) | $\Delta T$ (K) | P <sub>0</sub> (bar) | $\Delta P$ (bar) |
| 273.35       | 29.42   | 274.9894           | -1.63939       | 24.42002             | 4.999984         |
| 277.25       | 44.16   | 278.6330           | -1.38298       | 37.89874             | 6.261257         |
| 279.95       | 58.99   | 281.2901           | -1.34009       | 51.01011             | 7.979889         |
| 282.05       | 74.01   | 283.4073           | -1.35733       | 64.01860             | 9.991403         |
| 283.75       | 89.23   | 285.1771           | -1.42706       | 76.75313             | 12.47687         |
| gly 3.0 mol% |         |                    |                |                      |                  |
| T (K)        | P (bar) | T <sub>0</sub> (K) | $\Delta T$ (K) | P <sub>0</sub> (bar) | $\Delta P$ (bar) |
| 272.85       | 29.16   | 274.9108           | -2.06082       | 23.06108             | 6.098919         |
| 276.75       | 43.98   | 278.5959           | -1.84586       | 35.84708             | 8.132919         |
| 279.45       | 58.78   | 281.2571           | -1.80705       | 48.30028             | 10.47972         |
| 281.40       | 73.49   | 283.3410           | -1.94104       | 59.69377             | 13.79623         |
| 283.05       | 88.71   | 285.1214           | -2.07142       | 71.24720             | 17.46280         |

| L-ala 0.5 mol% |         |                    |          |                      |          |
|----------------|---------|--------------------|----------|----------------------|----------|
| T (K)          | P (bar) | T <sub>0</sub> (K) | ΔT (K)   | P <sub>0</sub> (bar) | ΔP (bar) |
| 274.25         | 29.47   | 275.0044           | -0.75442 | 27.05682             | 2.413180 |
| 278.25         | 44.13   | 278.6268           | -0.37680 | 42.33565             | 1.794352 |
| 281.05         | 59.19   | 281.3214           | -0.27145 | 57.47962             | 1.710382 |
| 283.25         | 74.33   | 283.4479           | -0.19791 | 72.78146             | 1.548540 |
| 284.85         | 89.52   | 285.2080           | -0.35796 | 86.21378             | 3.306218 |
| L-ala 1.3 mol% |         |                    |          |                      |          |
| T (K)          | P (bar) | T <sub>0</sub> (K) | ΔT (K)   | P <sub>0</sub> (bar) | ΔP (bar) |
| 273.95         | 29.53   | 275.0224           | -1.07244 | 26.14964             | 3.380363 |
| 277.65         | 44.07   | 278.6144           | -0.96444 | 39.61858             | 4.451418 |
| 280.35         | 59.08   | 281.3042           | -0.95421 | 53.27956             | 5.800436 |
| 282.35         | 73.61   | 283.3564           | -1.00637 | 66.11183             | 7.498166 |
| 284.15         | 89.28   | 285.1824           | -1.0324  | 80.07518             | 9.204824 |
| L-ala 2.2 mol% |         |                    |          |                      |          |
| T (K)          | P (bar) | T <sub>0</sub> (K) | ΔT (K)   | P <sub>0</sub> (bar) | ΔP (bar) |
| 273.05         | 29.32   | 274.9592           | -1.90925 | 23.59593             | 5.724070 |
| 276.95         | 44.03   | 278.6062           | -1.65618 | 36.65495             | 7.375046 |
| 279.85         | 59.01   | 281.2932           | -1.44323 | 50.45703             | 8.552965 |
| 281.92         | 73.93   | 283.3972           | -1.47716 | 63.13089             | 10.79911 |
| 283.58         | 89.14   | 285.1675           | -1.58745 | 75.38060             | 13.75940 |

| L-ser 1.3 mol% |         |                    |          |                      |          |
|----------------|---------|--------------------|----------|----------------------|----------|
| T (K)          | P (bar) | T <sub>0</sub> (K) | ΔT (K)   | P <sub>0</sub> (bar) | ΔP (bar) |
| 273.75         | 29.38   | 274.9773           | -1.22734 | 25.56076             | 3.819243 |
| 277.45         | 44.23   | 278.6474           | -1.19738 | 38.74976             | 5.480244 |
| 280.25         | 59.17   | 281.3183           | -1.06831 | 52.70354             | 6.466461 |
| 282.25         | 74.25   | 283.4378           | -1.18778 | 65.40711             | 8.842888 |
| 284.05         | 89.40   | 285.1952           | -1.14518 | 79.23234             | 10.16766 |
| L-ser 3.0 mol% |         |                    |          |                      |          |
| T (K)          | P (bar) | T <sub>0</sub> (K) | ΔT (K)   | P <sub>0</sub> (bar) | ΔP (bar) |
| 272.65         | 29.37   | 274.9743           | -2.32433 | 22.53761             | 6.832395 |
| 276.50         | 44.00   | 278.6000           | -2.09999 | 34.86067             | 9.139334 |
| 279.15         | 58.85   | 281.2681           | -2.11807 | 46.73961             | 12.11039 |
| 281.20         | 73.81   | 283.3819           | -2.18188 | 58.41900             | 15.39100 |
| 282.85         | 88.89   | 285.1407           | -2.29071 | 69.74321             | 19.14679 |

| L-pro 1.3 mol% |         |                    |          |                      |          |
|----------------|---------|--------------------|----------|----------------------|----------|
| T (K)          | P (bar) | T <sub>0</sub> (K) | ΔT (K)   | P <sub>0</sub> (bar) | ΔP (bar) |
| 273.65         | 29.41   | 274.9864           | -1.33638 | 25.27099             | 4.139010 |
| 277.35         | 44.21   | 278.6433           | -1.29326 | 38.32205             | 5.887953 |
| 280.05         | 59.06   | 281.3011           | -1.25107 | 51.56887             | 7.491134 |
| 282.25         | 74.16   | 283.4264           | -1.17637 | 65.40711             | 8.752888 |
| 283.85         | 89.34   | 285.1888           | -1.33879 | 77.57139             | 11.76861 |
| L-pro 3.0 mol% |         |                    |          |                      |          |
| T (K)          | P (bar) | T <sub>0</sub> (K) | ΔT (K)   | P <sub>0</sub> (bar) | ΔP (bar) |
| 272.30         | 29.29   | 274.9502           | -2.65018 | 21.64818             | 7.641818 |
| 276.15         | 44.05   | 278.6103           | -2.46031 | 33.52225             | 10.52775 |
| 278.85         | 58.74   | 281.2507           | -2.40074 | 45.22616             | 13.51384 |
| 280.95         | 73.78   | 283.3781           | -2.42806 | 56.86126             | 16.91874 |
| 282.50         | 88.68   | 285.1182           | -2.61820 | 67.18228             | 21.49772 |
| L-pro 6.0 mol% |         |                    |          |                      |          |
| T (K)          | P (bar) | T <sub>0</sub> (K) | ΔT (K)   | P <sub>0</sub> (bar) | ΔP (bar) |
| 268.40         | 28.87   | 274.8224           | -6.42240 | 13.72424             | 15.14576 |
| 272.49         | 43.33   | 278.4606           | -5.97061 | 22.12685             | 21.20315 |
| 275.05         | 57.77   | 281.0966           | -6.04661 | 29.62206             | 28.14794 |
| 277.00         | 72.31   | 283.1890           | -6.18896 | 36.85958             | 35.45042 |
| 278.65         | 86.98   | 284.9341           | -6.28408 | 44.24277             | 42.73723 |
| L-pro 9.0 mol% |         |                    |          |                      |          |
| T (K)          | P (bar) | T <sub>0</sub> (K) | ΔT (K)   | P <sub>0</sub> (bar) | ΔP (bar) |
| 264.90         | 28.39   | 274.6742           | -9.77422 | 9.013511             | 19.37649 |
| 268.10         | 42.43   | 278.2702           | -10.1702 | 13.24415             | 29.18585 |
| 270.65         | 56.62   | 280.9107           | -10.2607 | 17.88038             | 38.73962 |
| 272.65         | 70.74   | 282.9830           | -10.3330 | 22.53761             | 48.20239 |
| 274.00         | 84.73   | 284.6852           | -10.6852 | 26.29884             | 58.43116 |

**Table S10. Quantitative analysis of the NG hydrate phase equilibrium data.**

| gly 0.5 mol% |         |                    |          |                      |           |
|--------------|---------|--------------------|----------|----------------------|-----------|
| T (K)        | P (bar) | T <sub>0</sub> (K) | ΔT (K)   | P <sub>0</sub> (bar) | ΔP (bar)  |
| 276.25       | 12.48   | 276.5980           | -0.34804 | 11.97811             | 0.501888  |
| 280.45       | 19.47   | 280.4261           | 0.02388  | 19.52335             | -0.053350 |
| 283.05       | 26.56   | 283.1624           | -0.11240 | 26.22647             | 0.333532  |
| 285.05       | 33.71   | 285.2995           | -0.24948 | 32.79086             | 0.919140  |
| 286.75       | 40.86   | 287.0476           | -0.29757 | 39.55031             | 1.309695  |
| gly 1.3 mol% |         |                    |          |                      |           |
| T (K)        | P (bar) | T <sub>0</sub> (K) | ΔT (K)   | P <sub>0</sub> (bar) | ΔP (bar)  |
| 275.85       | 12.43   | 276.5640           | -0.71396 | 11.42471             | 1.005291  |
| 280.15       | 19.52   | 280.4485           | -0.29850 | 18.86299             | 0.657008  |
| 282.65       | 26.53   | 283.1523           | -0.50234 | 25.07105             | 1.458953  |
| 284.75       | 33.55   | 285.2565           | -0.50651 | 31.71668             | 1.833319  |
| 286.45       | 41.03   | 287.0855           | -0.63553 | 38.26977             | 2.760229  |
| gly 2.2 mol% |         |                    |          |                      |           |
| T (K)        | P (bar) | T <sub>0</sub> (K) | ΔT (K)   | P <sub>0</sub> (bar) | ΔP (bar)  |
| 275.45       | 12.47   | 276.5912           | -1.14123 | 10.89538             | 1.574624  |
| 279.75       | 19.50   | 280.4396           | -0.68956 | 18.01506             | 1.484939  |
| 282.25       | 26.43   | 283.1187           | -0.86875 | 23.96347             | 2.466533  |
| 284.35       | 33.55   | 285.2565           | -0.90651 | 30.33566             | 3.214337  |
| 285.95       | 40.88   | 287.0520           | -1.10204 | 36.22146             | 4.658543  |
| gly 3.0 mol% |         |                    |          |                      |           |
| T (K)        | P (bar) | T <sub>0</sub> (K) | ΔT (K)   | P <sub>0</sub> (bar) | ΔP (bar)  |
| 274.85       | 12.45   | 276.5776           | -1.72761 | 10.14438             | 2.305621  |
| 279.15       | 19.43   | 280.4082           | -1.25817 | 16.80994             | 2.620061  |
| 281.75       | 26.51   | 283.1456           | -1.39563 | 22.64346             | 3.866540  |
| 283.85       | 33.55   | 285.2565           | -1.40651 | 28.68858             | 4.861419  |
| 285.35       | 40.70   | 287.0117           | -1.66170 | 33.89904             | 6.800955  |

| L-ala 0.5 mol% |         |                    |          |                      |          |
|----------------|---------|--------------------|----------|----------------------|----------|
| T (K)          | P (bar) | T <sub>0</sub> (K) | ΔT (K)   | P <sub>0</sub> (bar) | ΔP (bar) |
| 276.15         | 12.51   | 276.6184           | -0.46842 | 11.83745             | 0.672550 |
| 280.15         | 19.48   | 280.4306           | -0.28060 | 18.86299             | 0.617008 |
| 282.95         | 26.55   | 283.1590           | -0.20905 | 25.93302             | 0.616976 |
| 284.85         | 33.71   | 285.2995           | -0.44948 | 32.07102             | 1.638977 |
| 286.65         | 41.02   | 287.0833           | -0.43331 | 39.11907             | 1.900932 |
| L-ala 1.3 mol% |         |                    |          |                      |          |
| T (K)          | P (bar) | T <sub>0</sub> (K) | ΔT (K)   | P <sub>0</sub> (bar) | ΔP (bar) |
| 275.75         | 12.45   | 276.5776           | -0.82761 | 11.29016             | 1.159842 |
| 279.95         | 19.50   | 280.4396           | -0.48956 | 18.43445             | 1.065545 |
| 282.55         | 26.55   | 283.1590           | -0.60905 | 24.78974             | 1.760260 |
| 284.55         | 33.57   | 285.2619           | -0.71189 | 31.01897             | 2.551027 |
| 286.35         | 41.06   | 287.0922           | -0.74222 | 37.85163             | 3.208374 |
| L-ala 2.2 mol% |         |                    |          |                      |          |
| T (K)          | P (bar) | T <sub>0</sub> (K) | ΔT (K)   | P <sub>0</sub> (bar) | ΔP (bar) |
| 275.15         | 12.37   | 276.5229           | -1.37290 | 10.51358             | 1.856417 |
| 279.45         | 19.50   | 280.4396           | -0.98956 | 17.40272             | 2.097282 |
| 282.05         | 26.55   | 283.1590           | -1.10905 | 23.42704             | 3.122962 |
| 284.15         | 33.59   | 285.2673           | -1.11727 | 29.66648             | 3.923524 |
| 285.75         | 40.86   | 287.0476           | -1.29757 | 35.43125             | 5.428746 |

| L-ser 1.3 mol% |         |                    |          |                      |          |
|----------------|---------|--------------------|----------|----------------------|----------|
| T (K)          | P (bar) | T <sub>0</sub> (K) | ΔT (K)   | P <sub>0</sub> (bar) | ΔP (bar) |
| 275.45         | 12.40   | 276.5435           | -1.09345 | 10.89538             | 1.504624 |
| 279.75         | 19.49   | 280.4351           | -0.68508 | 18.01506             | 1.474939 |
| 282.55         | 26.55   | 283.1590           | -0.60905 | 24.78974             | 1.760260 |
| 284.45         | 33.73   | 285.3048           | -0.85484 | 30.67554             | 3.054465 |
| 286.15         | 40.67   | 287.0050           | -0.85496 | 37.02814             | 3.641859 |
| L-ser 3.0 mol% |         |                    |          |                      |          |
| T (K)          | P (bar) | T <sub>0</sub> (K) | ΔT (K)   | P <sub>0</sub> (bar) | ΔP (bar) |
| 274.05         | 12.36   | 276.5160           | -2.46603 | 9.218462             | 3.141538 |
| 278.35         | 19.38   | 280.3857           | -2.03569 | 15.32046             | 4.059544 |
| 281.45         | 26.43   | 283.1187           | -1.66875 | 21.88450             | 4.545496 |
| 283.45         | 33.50   | 285.2430           | -1.79305 | 27.43165             | 6.068350 |
| 284.75         | 40.52   | 286.9712           | -2.22119 | 31.71668             | 8.803319 |



| L-pro 1.3 mol% |         |                    |          |                      |          |
|----------------|---------|--------------------|----------|----------------------|----------|
| T (K)          | P (bar) | T <sub>0</sub> (K) | ΔT (K)   | P <sub>0</sub> (bar) | ΔP (bar) |
| 274.85         | 12.41   | 276.5503           | -1.70029 | 10.14438             | 2.265621 |
| 279.35         | 19.46   | 280.4216           | -1.07164 | 17.20298             | 2.257020 |
| 282.05         | 26.46   | 283.1288           | -1.07884 | 23.42704             | 3.032962 |
| 283.95         | 33.60   | 285.2700           | -1.31996 | 29.01114             | 4.588861 |
| 285.45         | 40.66   | 287.0027           | -1.55271 | 34.27617             | 6.383831 |
| L-pro 3.0 mol% |         |                    |          |                      |          |
| T (K)          | P (bar) | T <sub>0</sub> (K) | ΔT (K)   | P <sub>0</sub> (bar) | ΔP (bar) |
| 273.65         | 12.34   | 276.5023           | -2.85229 | 8.785851             | 3.554149 |
| 277.65         | 19.30   | 280.3496           | -2.69961 | 14.11964             | 5.180362 |
| 280.45         | 26.31   | 283.0783           | -2.62827 | 19.52335             | 6.786651 |
| 282.45         | 33.39   | 285.2134           | -2.76335 | 24.51139             | 8.878606 |
| 283.75         | 40.55   | 286.9779           | -3.22795 | 28.36939             | 12.18061 |
| L-pro 6.0 mol% |         |                    |          |                      |          |
| T (K)          | P (bar) | T <sub>0</sub> (K) | ΔT (K)   | P <sub>0</sub> (bar) | ΔP (bar) |
| 270.75         | 12.35   | 276.5092           | -5.75917 | 6.174448             | 6.175552 |
| 274.50         | 19.03   | 280.2268           | -5.72679 | 9.729034             | 9.300966 |
| 277.10         | 25.95   | 282.9558           | -5.85581 | 13.23871             | 12.71129 |
| 279.20         | 32.92   | 285.0854           | -5.88544 | 16.90740             | 16.01260 |
| 280.65         | 39.95   | 286.8418           | -6.19178 | 19.97556             | 19.97444 |
| L-pro 9.0 mol% |         |                    |          |                      |          |
| T (K)          | P (bar) | T <sub>0</sub> (K) | ΔT (K)   | P <sub>0</sub> (bar) | ΔP (bar) |
| 267.65         | 12.06   | 276.3077           | -8.65771 | 4.199302             | 7.860698 |
| 271.25         | 18.91   | 280.1717           | -8.92168 | 6.565127             | 12.34487 |
| 274.00         | 25.68   | 282.8629           | -8.86292 | 9.163312             | 16.51669 |
| 275.70         | 32.57   | 284.9891           | -9.28908 | 11.22344             | 21.34656 |
| 276.75         | 39.32   | 286.6967           | -9.94672 | 12.70527             | 26.61473 |

## 9. Polarized Raman spectra

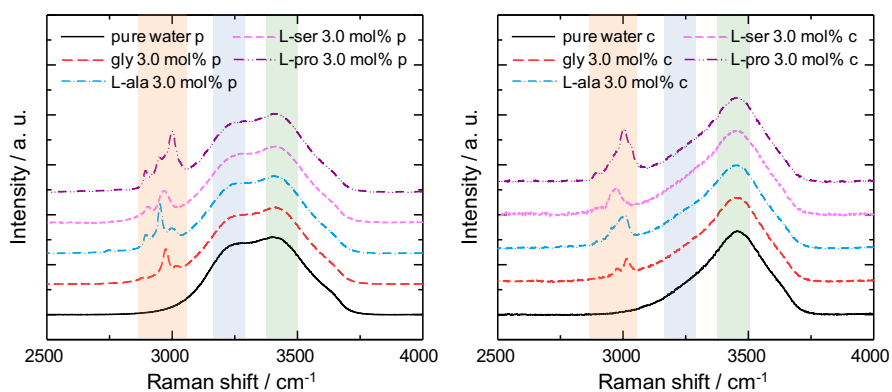

**Figure S4.** Polarized Raman spectra of the aqueous amino acid solutions for the parallel and cross polarizations. The orange region indicates the unique stretching band of each amino acid<sup>13</sup>. The blue and green regions indicate the collective and non-collective bands of water molecules, respectively.

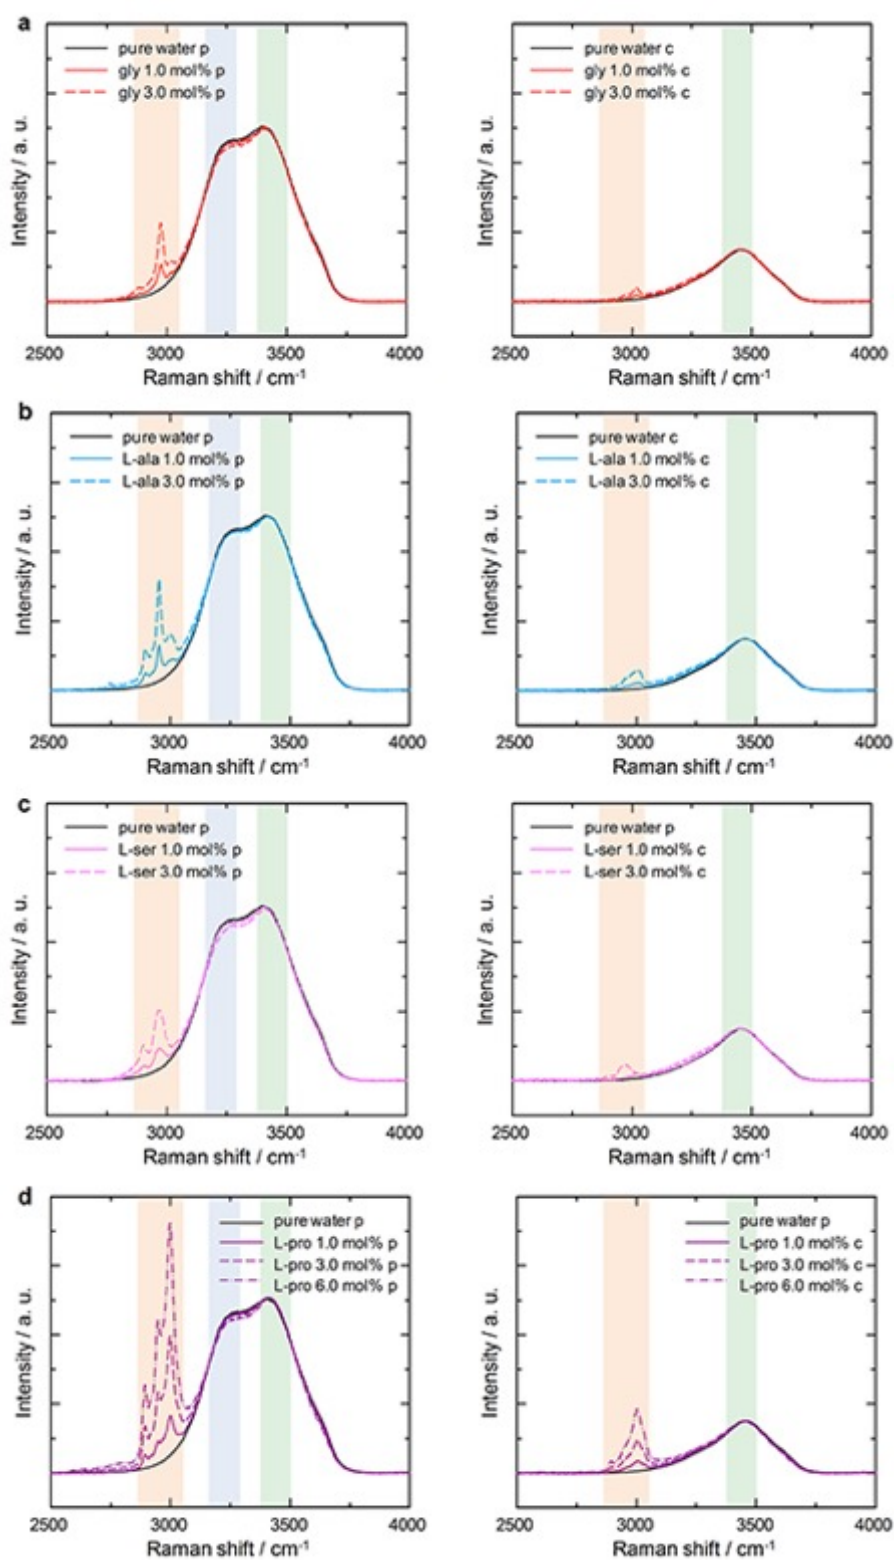

**Figure S5.** Polarized Raman spectra of aqueous solutions containing (a) glycine, (b) L-alanine, (c) L-serine, and (d) L-proline for the parallel (p) and cross (c) polarizations.

## 10. Experimental investigation of THF hydrate crystal morphologies

The morphologies of THF hydrate crystals were investigated. Pure THF hydrate crystals are octahedral (Fig. S6a) because their (111) faces are the slowest growing planes<sup>1,2</sup>. In the presence of PVP, THF hydrate crystals are planar (Fig. S6b), as is consistent with previous results<sup>1,2</sup>. This planarity is attributed to the preferential adsorption of PVP onto the (111) faces, which interrupts further hydrate growth. Interestingly, it has previously been demonstrated that polyvinyl caprolactam completely inhibits the growth of THF hydrate crystals<sup>14</sup>. This inhibition of hydrate growth by polymeric hydrate inhibitors has been explained with the adsorption inhibition hypothesis<sup>15</sup>. However, the addition of amino acids does not alter the morphologies of THF hydrate crystals (Figs. S6c to S6f), which implies that adsorption phenomena do not explain hydrate inhibition by amino acids. Amino acids readily form hydrogen bonds with water molecules, but their molecular sizes are too small for efficient blocking of hydrate surfaces. The inhibition of hydrate formation by amino acids can be explained by the perturbation of the structure of water.

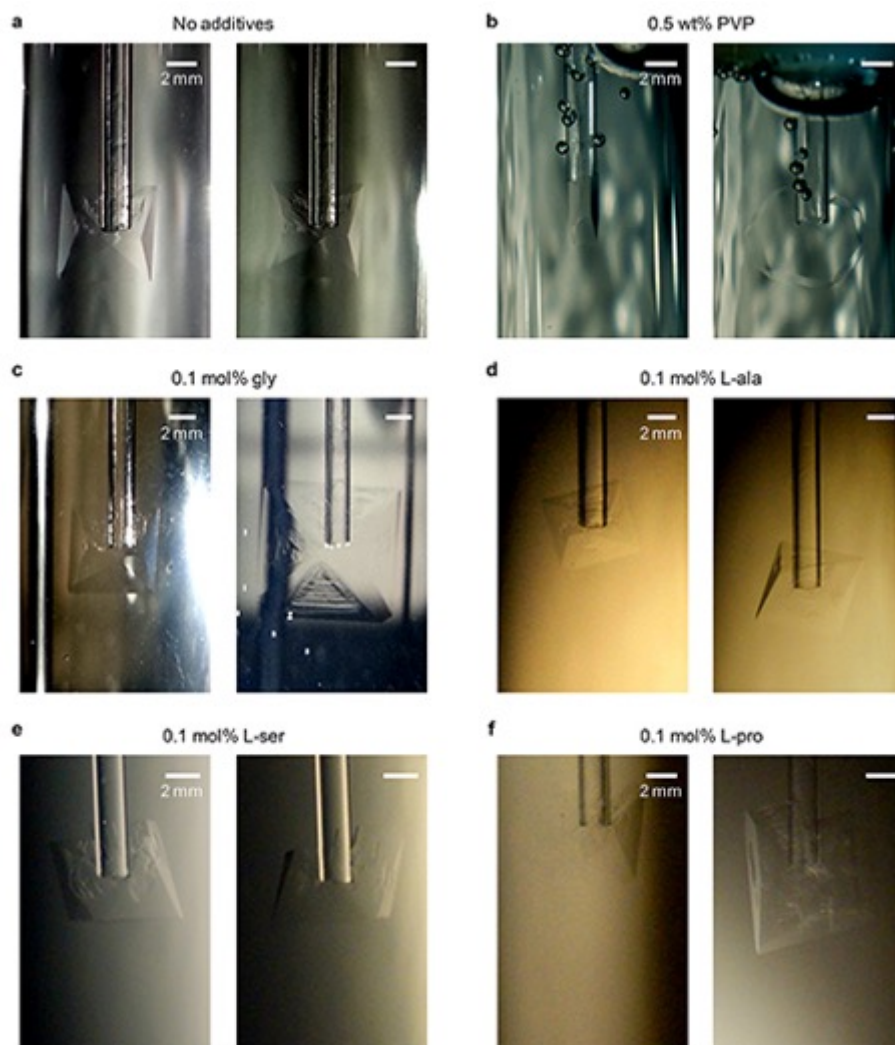

**Figure S6.** Morphologies of THF hydrate crystals with (a) no additives, (b) PVP, (c) glycine, (d) L-alanine, (e) L-serine, and (f) L-proline.

## References

- (1) Makogon, T. Y., Larsen, R., Knight, C. A. & Sloan, E. D. Melt growth of tetrahydrofuran clathrate hydrate and its inhibition: method and first results. *J. Cryst. Growth* **179**, 258–262 (1997).
- (2) Larsen, R., Knight, C. A. & Sloan, E. D. Clathrate hydrate growth and inhibition. *Fluid Phase Equilib.* **150–151**, 353–360 (1998).
- (3) Ballard, A. L. & Sloan, E. D. The next generation of hydrate prediction I. Hydrate standard states and incorporation of spectroscopy. *Fluid Phase Equilib.* **194–197**, 371–383 (2002).
- (4) Dunn, M. S., Ross, F. J. & Read, L. S. The solubility of the amino acids in water. *J. Biol. Chem.* **103**, 579–595 (1933).
- (5) Fasman, G. D. *Handbook of Biochemistry and Molecular Biology* (CRC Press, Cleveland, OH, 1976).
- (6) Amend, J. P. & Helgeson, H. C. Solubilities of the common L- $\alpha$ -amino acids as a function of temperature and solution pH. *Pure Appl. Chem.* **69**, 935–942 (1997).
- (7) Kyte, J. & Doolittle, R. F. A simple method for displaying the hydropathic character of a protein. *J. Mol. Biol.* **157**, 105–132 (1982).
- (8) Bruice, P. Y. *Organic Chemistry* (Pearson Education, Upper Saddle River, NJ, 2007).
- (9) Kiss, T., Sovago, I. & Gergely, A. Critical Survey of stability constants of complexes of glycine. *Pure Appl. Chem.* **63**, 597–638 (1991).
- (10) Smith, P. K., Taylor, A. C. & Smith, E. R. B. Thermodynamic properties of solutions of amino acids and related substances. III. The ionization of aliphatic amino acids in aqueous solution from one to fifty degrees. *J. Biol. Chem.* **122**, 109–123 (1937).

- (11)Sa, J.-H., Kwak, G.-H., Lee, B. R., Ahn, D. & Lee, K.-H. Abnormal incorporation of amino acids into the gas hydrate crystal lattice. *Phys. Chem. Chem. Phys.* **16**, 26730–26734 (2014).
- (12)Rodríguez-Carvajal, J. Recent advances in magnetic structure determination by neutron powder diffraction. *Physica B* **192**, 55–69 (1993).
- (13)Sa, J.-H., Kwak, G.-H., Han, K., Ahn, D. & Lee, K.-H. Gas hydrate inhibition by perturbation of liquid water structure. *Sci. Rep.* **5**, 11526 (2015).
- (14)Carver, T. J., Drew, M. G. B. & Rodger, P. M., Inhibition of crystal growth in methane hydrate. *J. Chem. Soc. Faraday Trans.* **91**, 3449–3460 (1995).
- (15)Anderson, B. J., Tester, J. W., Borghi, G. P. & Trout, B. L. Properties of inhibitors of methane hydrate formation via molecular dynamics simulations. *J. Am. Chem. Soc.* **127**, 17852–17862 (2005).
